# Supplementary material for: Structural insights into the LGR4-RSPO2-ZNRF3 complexes regulating WNT/β-catenin signaling
Source: PubMed Central journal article supplement — Nat Commun. 2025 Jan 3;16:362. doi: 10.1038/s41467-024-55431-3 (PMC11698847; doi:10.1038/s41467-024-55431-3), 2025-01-03
Supplement: 41467_2024_55431_MOESM2_ESM.pdf [file 41467_2024_55431_MOESM2_ESM.pdf]

# FACSDiva Version 6.2

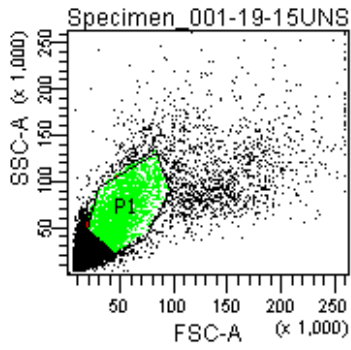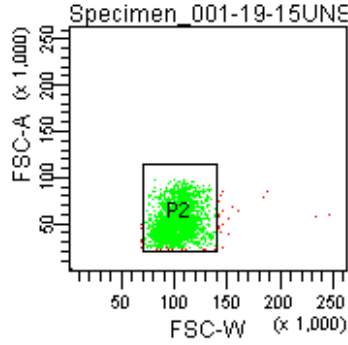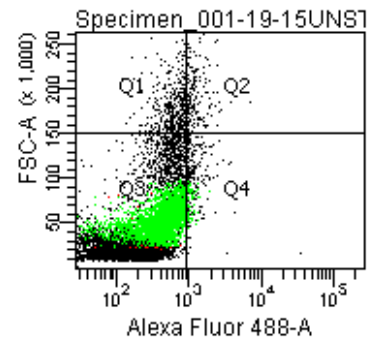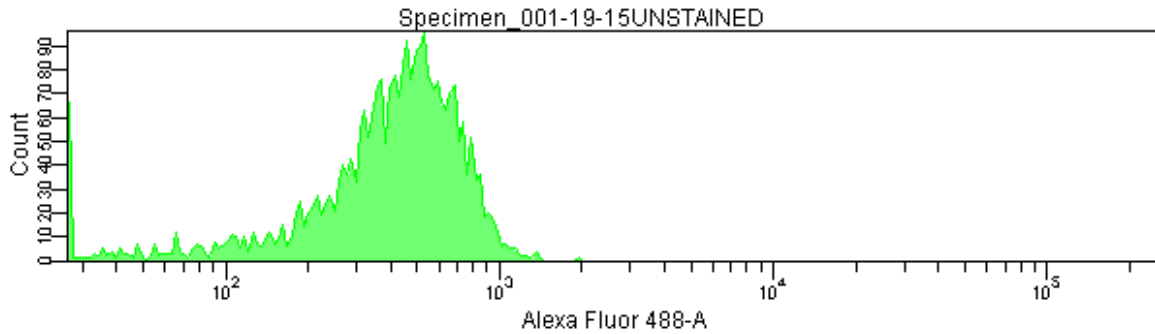

Experiment Name: Experiment\_20221019-EXPRESSION  
 Specimen Name: Specimen\_001  
 Tube Name: 19-15UNSTAINED  
 Record Date: Oct 19, 2022 3:57:25 PM  
 \$OP: Administrator

| Population   | #Events | %Parent | FSC-A Mean |
|--------------|---------|---------|------------|
| ■ All Events | 10,000  | ###     | 45,085     |
| ☒ Q1         | 342     | 3.4     | 181,134    |
| ☒ Q2         | 237     | 2.4     | 203,001    |
| ☒ Q3         | 9,066   | 90.7    | 34,061     |
| ☒ Q4         | 355     | 3.6     | 90,124     |
| ■ P1         | 2,826   | 28.3    | 49,903     |
| ■ P2         | 2,786   | 98.6    | 50,031     |

Tube: 19-15UNSTAINED

| Population   | #Events | %Parent | %Total |
|--------------|---------|---------|--------|
| ■ All Events | 10,000  | ###     | 100.0  |
| ☒ Q1         | 342     | 3.4     | 3.4    |
| ☒ Q2         | 237     | 2.4     | 2.4    |
| ☒ Q3         | 9,066   | 90.7    | 90.7   |
| ☒ Q4         | 355     | 3.6     | 3.6    |
| ■ P1         | 2,826   | 28.3    | 28.3   |
| ■ P2         | 2,786   | 98.6    | 27.9   |

## FACSDiva Version 6.2

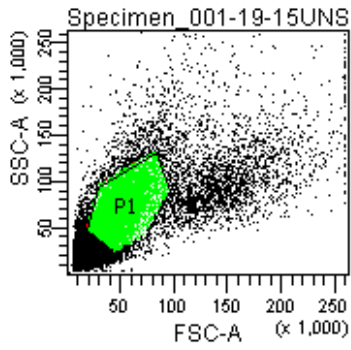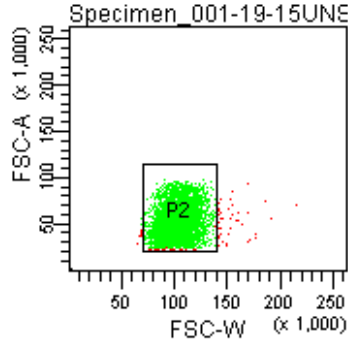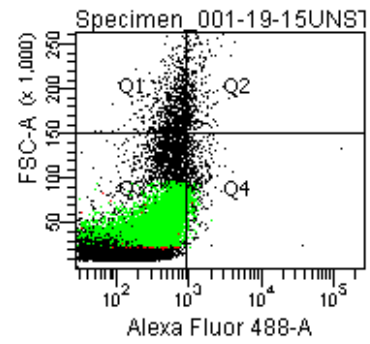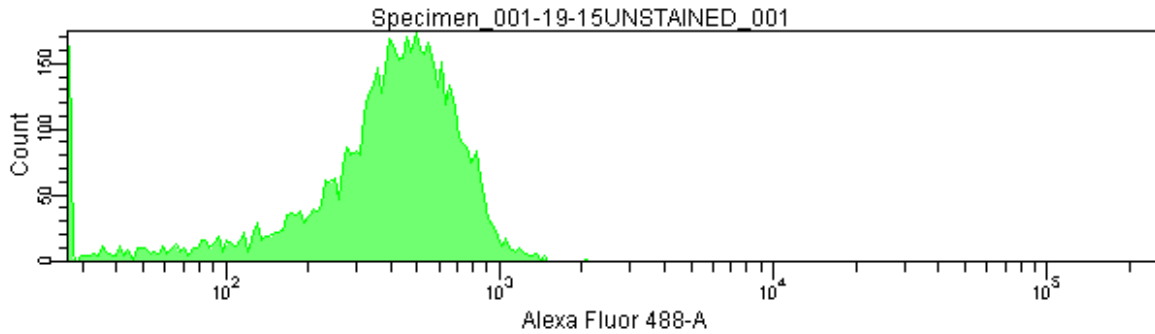

Experiment Name: Experiment\_20221019-EXPRESSION  
 Specimen Name: Specimen\_001  
 Tube Name: 19-15UNSTAINED\_001  
 Record Date: Oct 19, 2022 4:01:14 PM  
 \$OP: Administrator

| Population   | #Events | %Parent | FSC-A Mean |
|--------------|---------|---------|------------|
| ■ All Events | 20,000  | ###     | 43,219     |
| ☒ Q1         | 658     | 3.3     | 180,647    |
| ☒ Q2         | 392     | 2.0     | 204,505    |
| ☒ Q3         | 18,248  | 91.2    | 33,027     |
| ☒ Q4         | 702     | 3.5     | 89,266     |
| ■ P1         | 5,640   | 28.2    | 48,765     |
| ■ P2         | 5,548   | 98.4    | 48,946     |

Tube: 19-15UNSTAINED\_001

| Population   | #Events | %Parent | %Total |
|--------------|---------|---------|--------|
| ■ All Events | 20,000  | ###     | 100.0  |
| ☒ Q1         | 658     | 3.3     | 3.3    |
| ☒ Q2         | 392     | 2.0     | 2.0    |
| ☒ Q3         | 18,248  | 91.2    | 91.2   |
| ☒ Q4         | 702     | 3.5     | 3.5    |
| ■ P1         | 5,640   | 28.2    | 28.2   |
| ■ P2         | 5,548   | 98.4    | 27.7   |

## FACSDiva Version 6.2

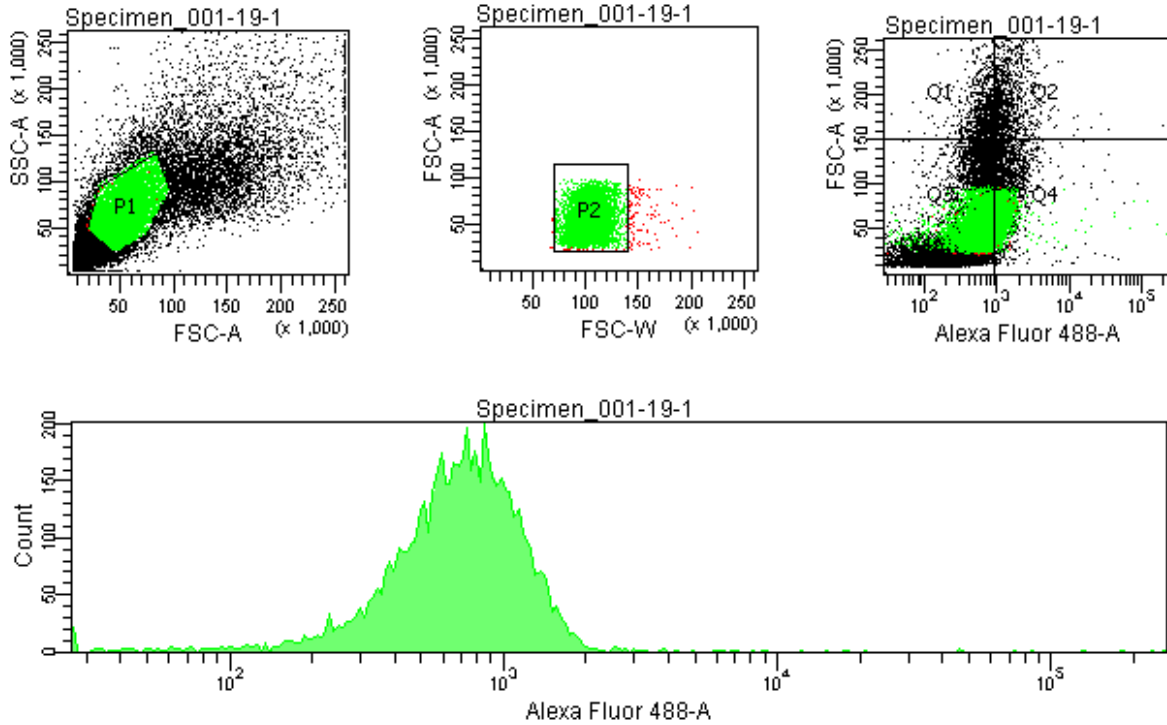

Experiment Name: Experiment\_20221019-EXPRESSION  
 Specimen Name: Specimen\_001  
 Tube Name: 19-1  
 Record Date: Oct 19, 2022 4:07:26 PM  
 \$OP: Administrator

| Population   | #Events | %Parent | FSC-A Mean |
|--------------|---------|---------|------------|
| ■ All Events | 20,000  | ####    | 62,116     |
| ☒ Q1         | 847     | 4.2     | 181,934    |
| ☒ Q2         | 1,201   | 6.0     | 201,435    |
| ☒ Q3         | 14,412  | 72.1    | 39,497     |
| ☒ Q4         | 3,540   | 17.7    | 78,268     |
| ■ P1         | 5,962   | 29.8    | 52,461     |
| ■ P2         | 5,820   | 97.6    | 52,476     |

Tube: 19-1

| Population   | #Events | %Parent | %Total |
|--------------|---------|---------|--------|
| ■ All Events | 20,000  | ####    | 100.0  |
| ☒ Q1         | 847     | 4.2     | 4.2    |
| ☒ Q2         | 1,201   | 6.0     | 6.0    |
| ☒ Q3         | 14,412  | 72.1    | 72.1   |
| ☒ Q4         | 3,540   | 17.7    | 17.7   |
| ■ P1         | 5,962   | 29.8    | 29.8   |
| ■ P2         | 5,820   | 97.6    | 29.1   |

## FACSDiva Version 6.2

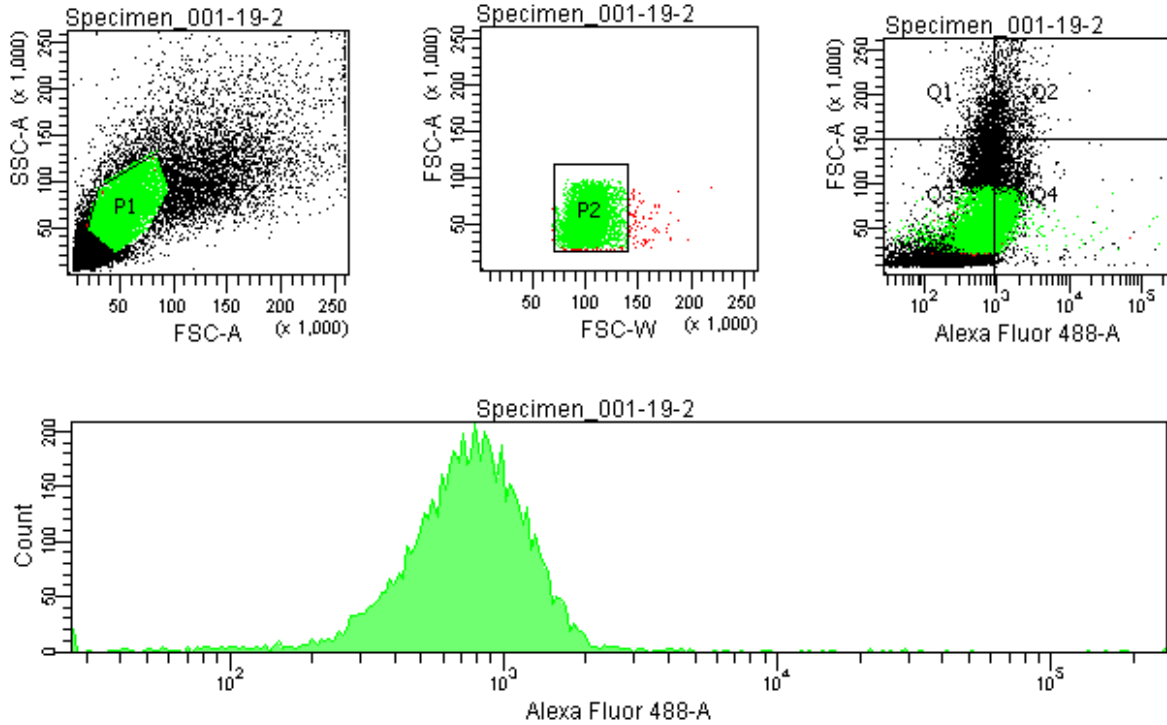

Experiment Name: Experiment\_20221019-EXPRESSION  
 Specimen Name: Specimen\_001  
 Tube Name: 19-2  
 Record Date: Oct 19, 2022 4:08:18 PM  
 \$OP: Administrator

| Population   | #Events | %Parent | FSC-A Mean |
|--------------|---------|---------|------------|
| ■ All Events | 20,000  | ###     | 55,797     |
| ☒ Q1         | 587     | 2.9     | 181,624    |
| ☒ Q2         | 979     | 4.9     | 199,889    |
| ☒ Q3         | 14,473  | 72.4    | 36,089     |
| ☒ Q4         | 3,961   | 19.8    | 73,549     |
| ■ P1         | 6,216   | 31.1    | 51,015     |
| ■ P2         | 6,086   | 97.9    | 51,160     |

Tube: 19-2

| Population   | #Events | %Parent | %Total |
|--------------|---------|---------|--------|
| ■ All Events | 20,000  | ###     | 100.0  |
| ☒ Q1         | 587     | 2.9     | 2.9    |
| ☒ Q2         | 979     | 4.9     | 4.9    |
| ☒ Q3         | 14,473  | 72.4    | 72.4   |
| ☒ Q4         | 3,961   | 19.8    | 19.8   |
| ■ P1         | 6,216   | 31.1    | 31.1   |
| ■ P2         | 6,086   | 97.9    | 30.4   |

## FACSDiva Version 6.2

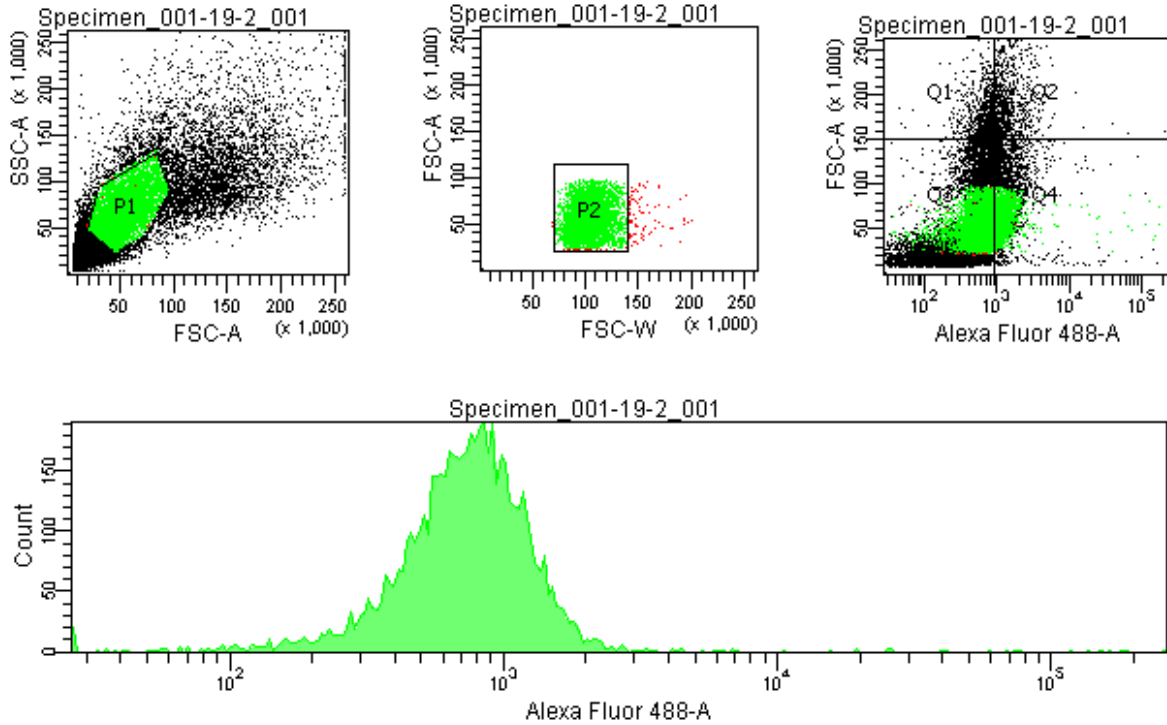

Experiment Name: Experiment\_20221019-EXPRESSION  
 Specimen Name: Specimen\_001  
 Tube Name: 19-2\_001  
 Record Date: Oct 19, 2022 4:09:26 PM  
 \$OP: Administrator

| Population   | #Events | %Parent | FSC-A Mean |
|--------------|---------|---------|------------|
| ■ All Events | 20,000  | ####    | 55,740     |
| ☒ Q1         | 643     | 3.2     | 180,266    |
| ☒ Q2         | 1,020   | 5.1     | 198,754    |
| ☒ Q3         | 14,704  | 73.5    | 35,853     |
| ☒ Q4         | 3,633   | 18.2    | 74,034     |
| ■ P1         | 5,850   | 29.2    | 51,363     |
| ■ P2         | 5,724   | 97.8    | 51,446     |

Tube: 19-2\_001

| Population   | #Events | %Parent | %Total |
|--------------|---------|---------|--------|
| ■ All Events | 20,000  | ####    | 100.0  |
| ☒ Q1         | 643     | 3.2     | 3.2    |
| ☒ Q2         | 1,020   | 5.1     | 5.1    |
| ☒ Q3         | 14,704  | 73.5    | 73.5   |
| ☒ Q4         | 3,633   | 18.2    | 18.2   |
| ■ P1         | 5,850   | 29.2    | 29.2   |
| ■ P2         | 5,724   | 97.8    | 28.6   |

## FACSDiva Version 6.2

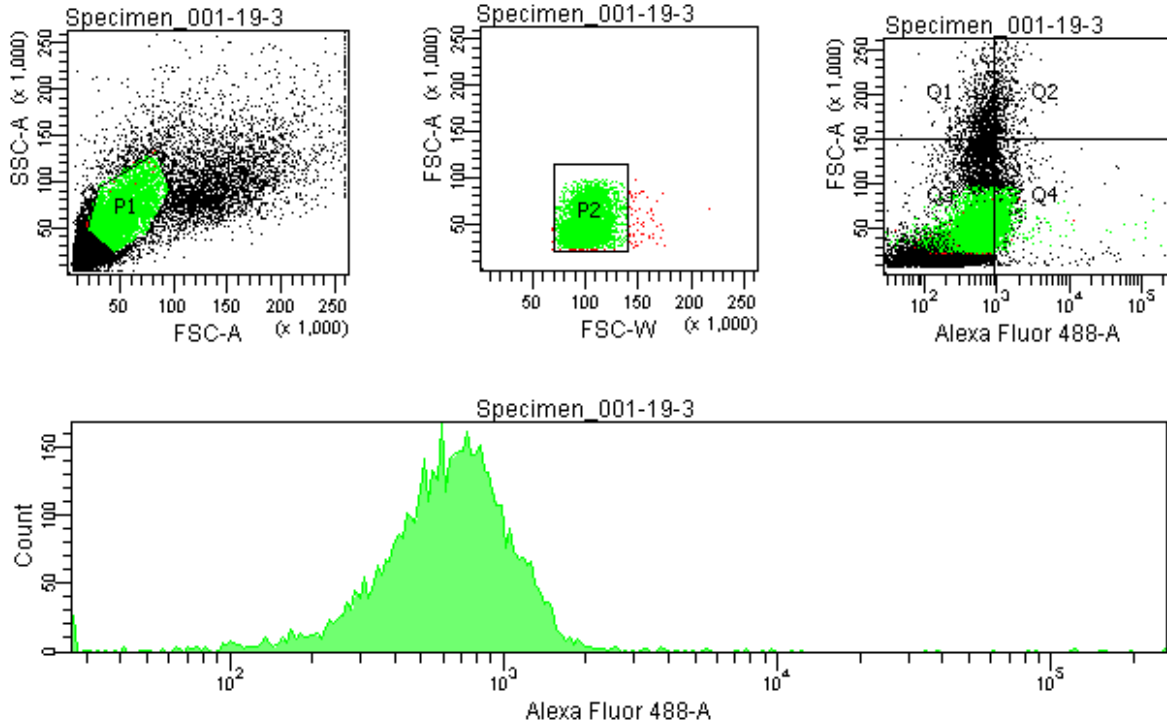

Experiment Name: Experiment\_20221019-EXPRESSION  
 Specimen Name: Specimen\_001  
 Tube Name: 19-3  
 Record Date: Oct 19, 2022 4:11:19 PM  
 \$OP: Administrator

| Population   | #Events | %Parent | FSC-A Mean |
|--------------|---------|---------|------------|
| ■ All Events | 20,000  | ###     | 47,917     |
| ☒ Q1         | 787     | 3.9     | 181,034    |
| ☒ Q2         | 574     | 2.9     | 200,512    |
| ☒ Q3         | 16,560  | 82.8    | 33,337     |
| ☒ Q4         | 2,079   | 10.4    | 71,530     |
| ■ P1         | 5,074   | 25.4    | 50,317     |
| ■ P2         | 4,971   | 98.0    | 50,496     |

Tube: 19-3

| Population   | #Events | %Parent | %Total |
|--------------|---------|---------|--------|
| ■ All Events | 20,000  | ###     | 100.0  |
| ☒ Q1         | 787     | 3.9     | 3.9    |
| ☒ Q2         | 574     | 2.9     | 2.9    |
| ☒ Q3         | 16,560  | 82.8    | 82.8   |
| ☒ Q4         | 2,079   | 10.4    | 10.4   |
| ■ P1         | 5,074   | 25.4    | 25.4   |
| ■ P2         | 4,971   | 98.0    | 24.9   |

FACSDiva Version 6.2

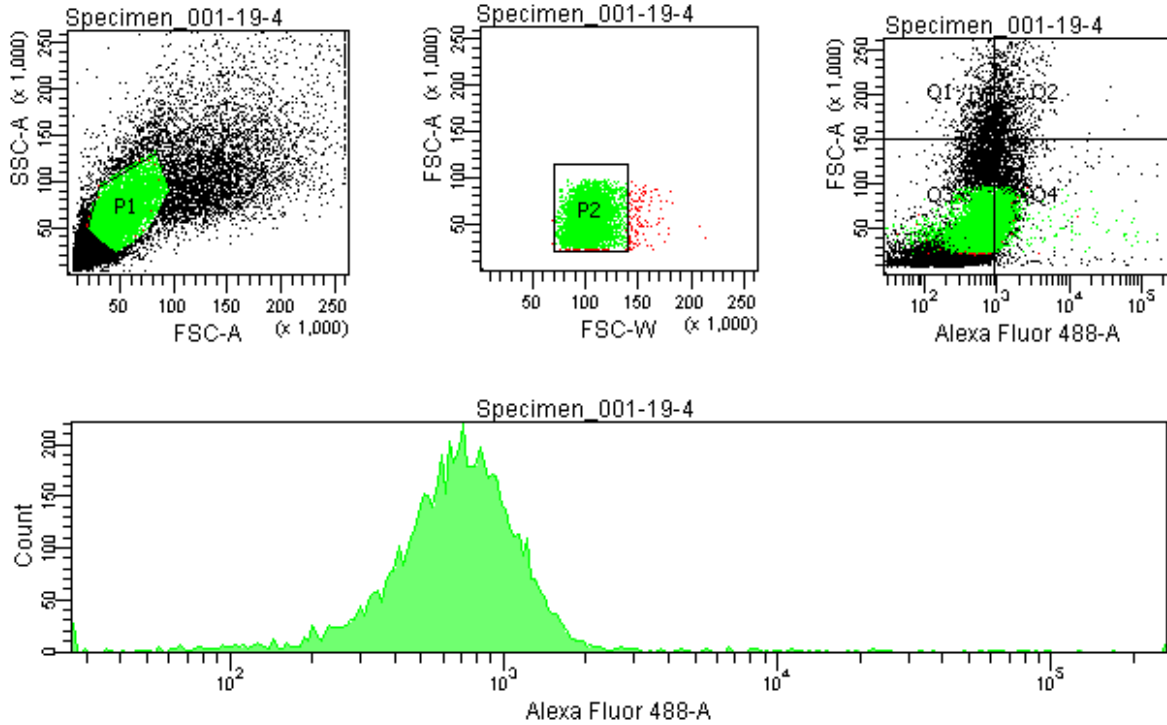

Experiment Name: Experiment\_20221019-EXPRESSION  
 Specimen Name: Specimen\_001  
 Tube Name: 19-4  
 Record Date: Oct 19, 2022 4:12:30 PM  
 \$OP: Administrator

| Population | #Events | %Parent | FSC-A Mean |
|------------|---------|---------|------------|
| All Events | 20,000  | ###     | 58,601     |
| Q1         | 737     | 3.7     | 180,084    |
| Q2         | 1,027   | 5.1     | 202,400    |
| Q3         | 14,753  | 73.8    | 38,267     |
| Q4         | 3,483   | 17.4    | 76,624     |
| P1         | 6,358   | 31.8    | 50,897     |
| P2         | 6,192   | 97.4    | 51,019     |

Tube: 19-4

| Population | #Events | %Parent | %Total |
|------------|---------|---------|--------|
| All Events | 20,000  | ###     | 100.0  |
| Q1         | 737     | 3.7     | 3.7    |
| Q2         | 1,027   | 5.1     | 5.1    |
| Q3         | 14,753  | 73.8    | 73.8   |
| Q4         | 3,483   | 17.4    | 17.4   |
| P1         | 6,358   | 31.8    | 31.8   |
| P2         | 6,192   | 97.4    | 31.0   |

## FACSDiva Version 6.2

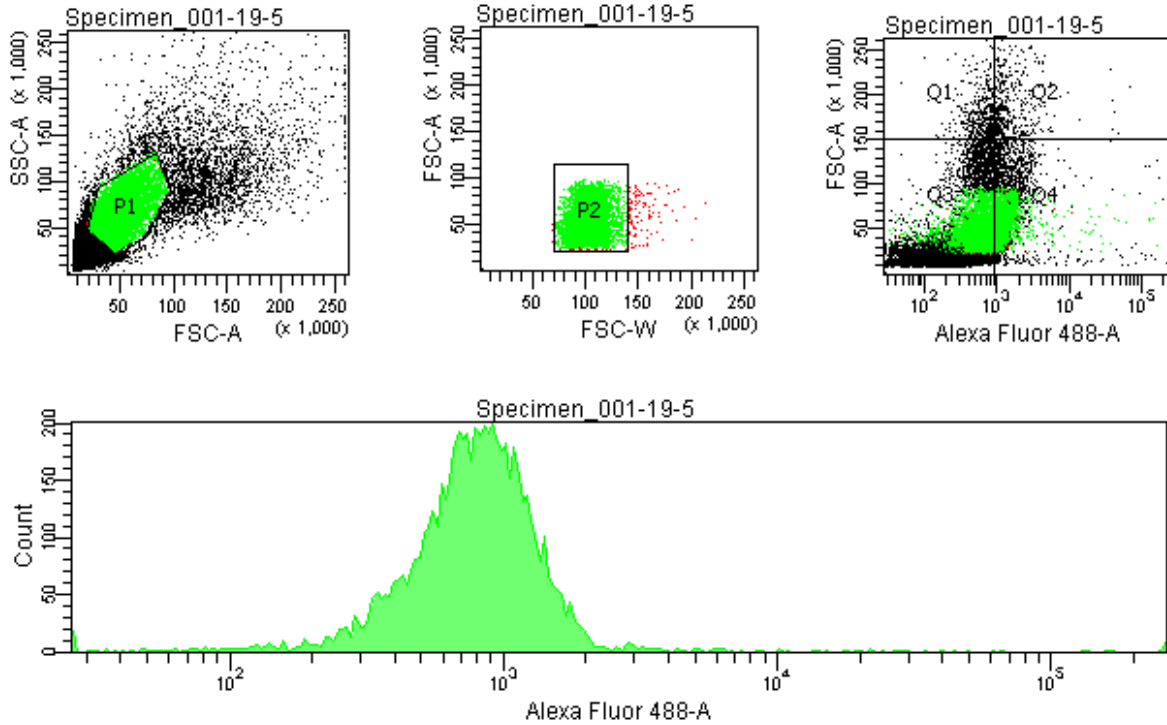

Experiment Name: Experiment\_20221019-EXPRESSION  
 Specimen Name: Specimen\_001  
 Tube Name: 19-5  
 Record Date: Oct 19, 2022 4:17:50 PM  
 \$OP: Administrator

| Population | #Events | %Parent | FSC-A Mean |
|------------|---------|---------|------------|
| All Events | 20,000  | ###     | 44,796     |
| Q1         | 414     | 2.1     | 178,747    |
| Q2         | 481     | 2.4     | 196,462    |
| Q3         | 15,240  | 76.2    | 30,885     |
| Q4         | 3,865   | 19.3    | 66,422     |
| P1         | 6,209   | 31.0    | 49,999     |
| P2         | 6,067   | 97.7    | 49,976     |

Tube: 19-5

| Population | #Events | %Parent | %Total |
|------------|---------|---------|--------|
| All Events | 20,000  | ###     | 100.0  |
| Q1         | 414     | 2.1     | 2.1    |
| Q2         | 481     | 2.4     | 2.4    |
| Q3         | 15,240  | 76.2    | 76.2   |
| Q4         | 3,865   | 19.3    | 19.3   |
| P1         | 6,209   | 31.0    | 31.0   |
| P2         | 6,067   | 97.7    | 30.3   |



# FACSDiva Version 6.2

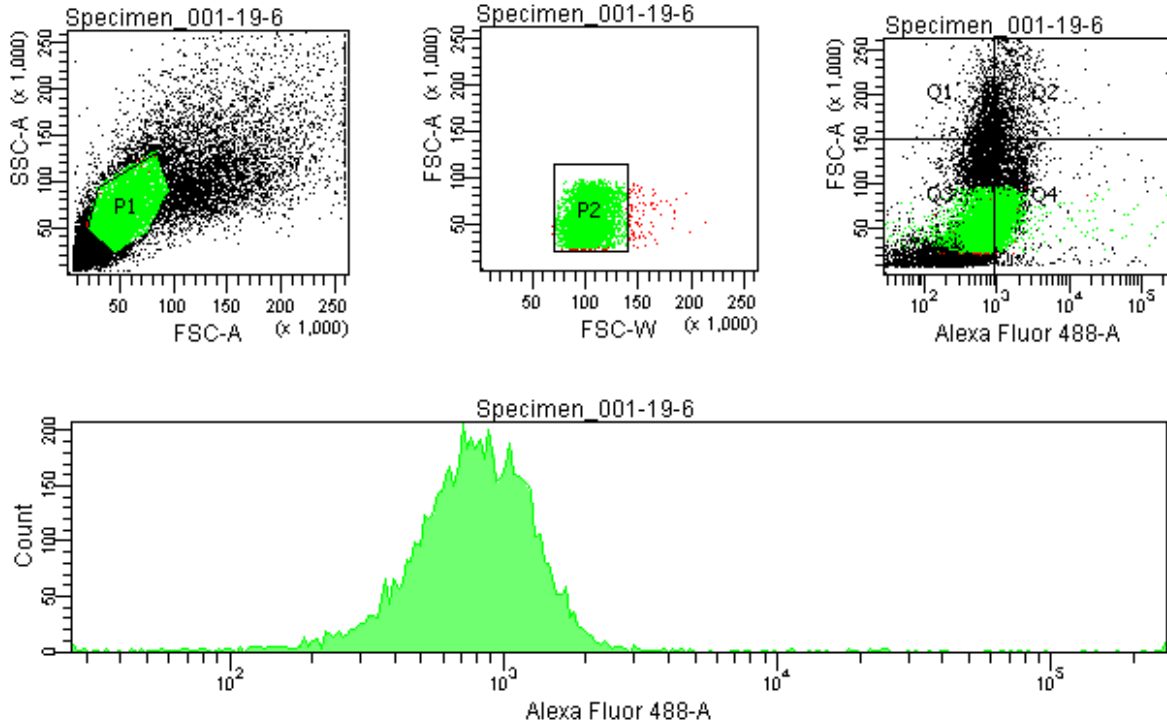

Experiment Name: Experiment\_20221019-EXPRESSION  
 Specimen Name: Specimen\_001  
 Tube Name: 19-6  
 Record Date: Oct 19, 2022 4:19:00 PM  
 \$OP: Administrator

| Population | #Events | %Parent | FSC-A Mean |
|------------|---------|---------|------------|
| All Events | 20,000  | ###     | 61,528     |
| Q1         | 769     | 3.8     | 183,769    |
| Q2         | 1,168   | 5.8     | 203,906    |
| Q3         | 13,614  | 68.1    | 38,512     |
| Q4         | 4,449   | 22.2    | 73,453     |
| P1         | 6,398   | 32.0    | 52,316     |
| P2         | 6,262   | 97.9    | 52,388     |

Tube: 19-6

| Population | #Events | %Parent | %Total |
|------------|---------|---------|--------|
| All Events | 20,000  | ###     | 100.0  |
| Q1         | 769     | 3.8     | 3.8    |
| Q2         | 1,168   | 5.8     | 5.8    |
| Q3         | 13,614  | 68.1    | 68.1   |
| Q4         | 4,449   | 22.2    | 22.2   |
| P1         | 6,398   | 32.0    | 32.0   |
| P2         | 6,262   | 97.9    | 31.3   |

# FACSDiva Version 6.2

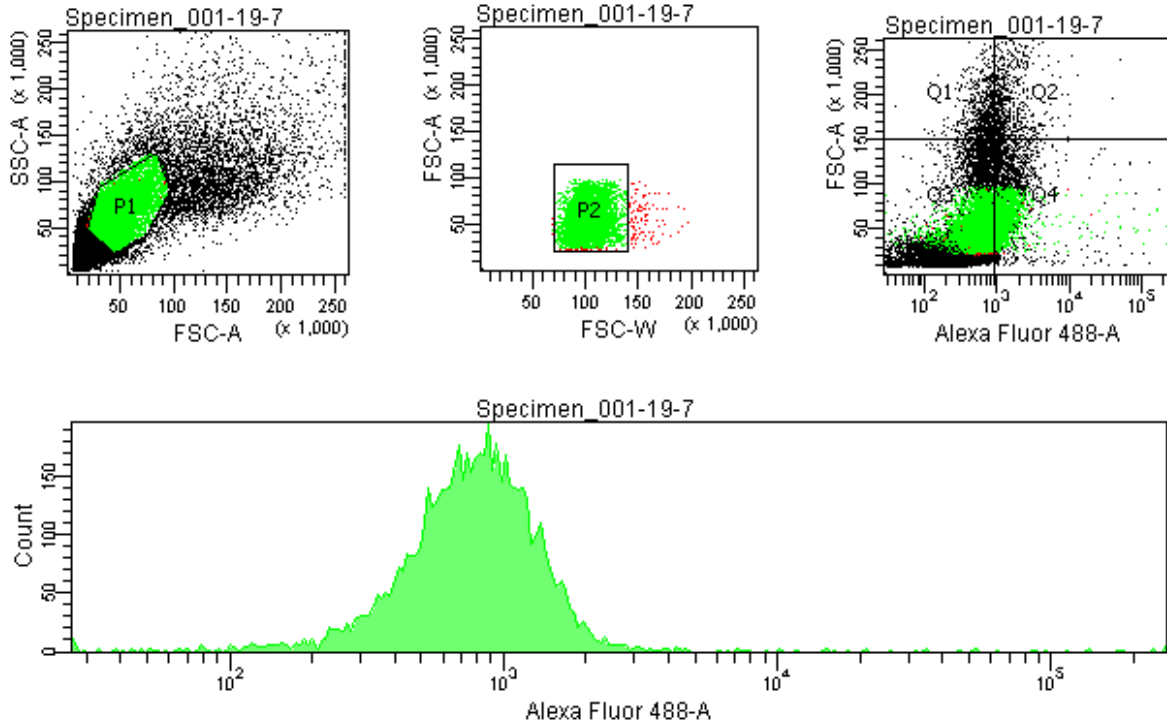

Experiment Name: Experiment\_20221019-EXPRESSION  
 Specimen Name: Specimen\_001  
 Tube Name: 19-7  
 Record Date: Oct 19, 2022 4:19:44 PM  
 \$OP: Administrator

| Population | #Events | %Parent | FSC-A Mean |
|------------|---------|---------|------------|
| All Events | 20,000  | ###     | 52,088     |
| Q1         | 642     | 3.2     | 181,743    |
| Q2         | 783     | 3.9     | 201,299    |
| Q3         | 14,661  | 73.3    | 33,619     |
| Q4         | 3,914   | 19.6    | 70,152     |
| P1         | 6,084   | 30.4    | 50,930     |
| P2         | 5,931   | 97.5    | 51,073     |

Tube: 19-7

| Population | #Events | %Parent | %Total |
|------------|---------|---------|--------|
| All Events | 20,000  | ###     | 100.0  |
| Q1         | 642     | 3.2     | 3.2    |
| Q2         | 783     | 3.9     | 3.9    |
| Q3         | 14,661  | 73.3    | 73.3   |
| Q4         | 3,914   | 19.6    | 19.6   |
| P1         | 6,084   | 30.4    | 30.4   |
| P2         | 5,931   | 97.5    | 29.7   |

# FACSDiva Version 6.2

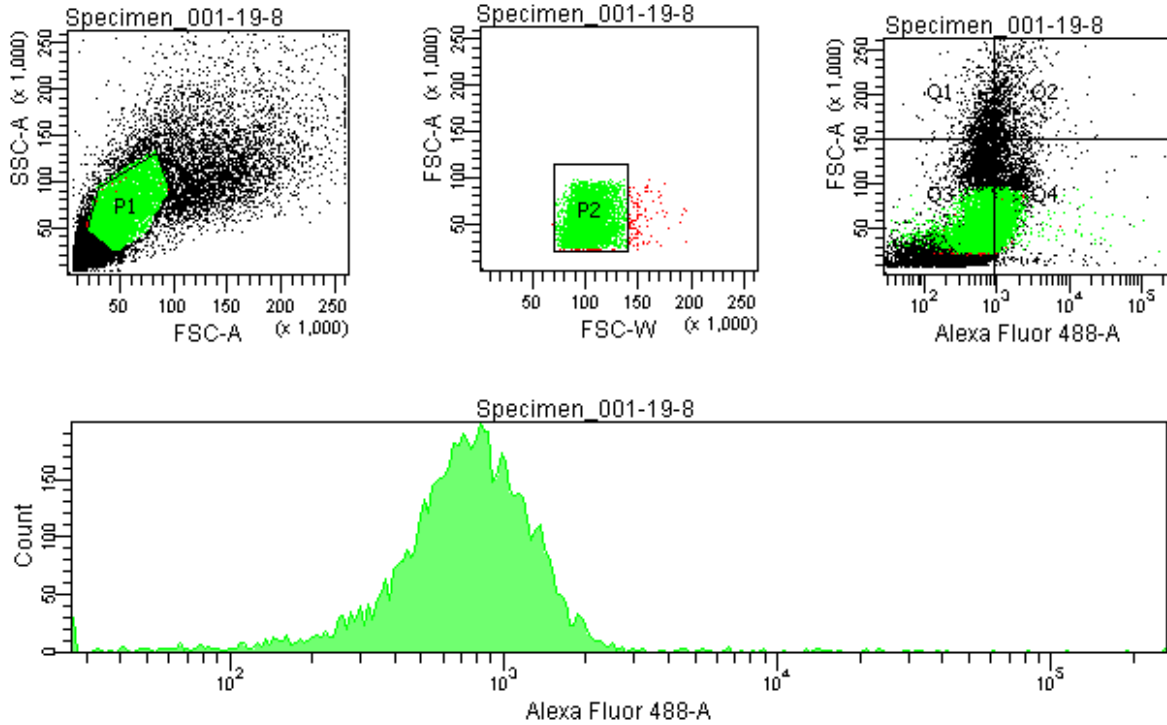

Experiment Name: Experiment\_20221019-EXPRESSION  
 Specimen Name: Specimen\_001  
 Tube Name: 19-8  
 Record Date: Oct 19, 2022 4:20:38 PM  
 \$OP: Administrator

| Population | #Events | %Parent | FSC-A Mean |
|------------|---------|---------|------------|
| All Events | 20,000  | ###     | 56,593     |
| Q1         | 631     | 3.2     | 178,433    |
| Q2         | 997     | 5.0     | 200,177    |
| Q3         | 14,287  | 71.4    | 36,513     |
| Q4         | 4,085   | 20.4    | 72,956     |
| P1         | 6,496   | 32.5    | 50,833     |
| P2         | 6,335   | 97.5    | 50,967     |

Tube: 19-8

| Population | #Events | %Parent | %Total |
|------------|---------|---------|--------|
| All Events | 20,000  | ###     | 100.0  |
| Q1         | 631     | 3.2     | 3.2    |
| Q2         | 997     | 5.0     | 5.0    |
| Q3         | 14,287  | 71.4    | 71.4   |
| Q4         | 4,085   | 20.4    | 20.4   |
| P1         | 6,496   | 32.5    | 32.5   |
| P2         | 6,335   | 97.5    | 31.7   |

## FACSDiva Version 6.2

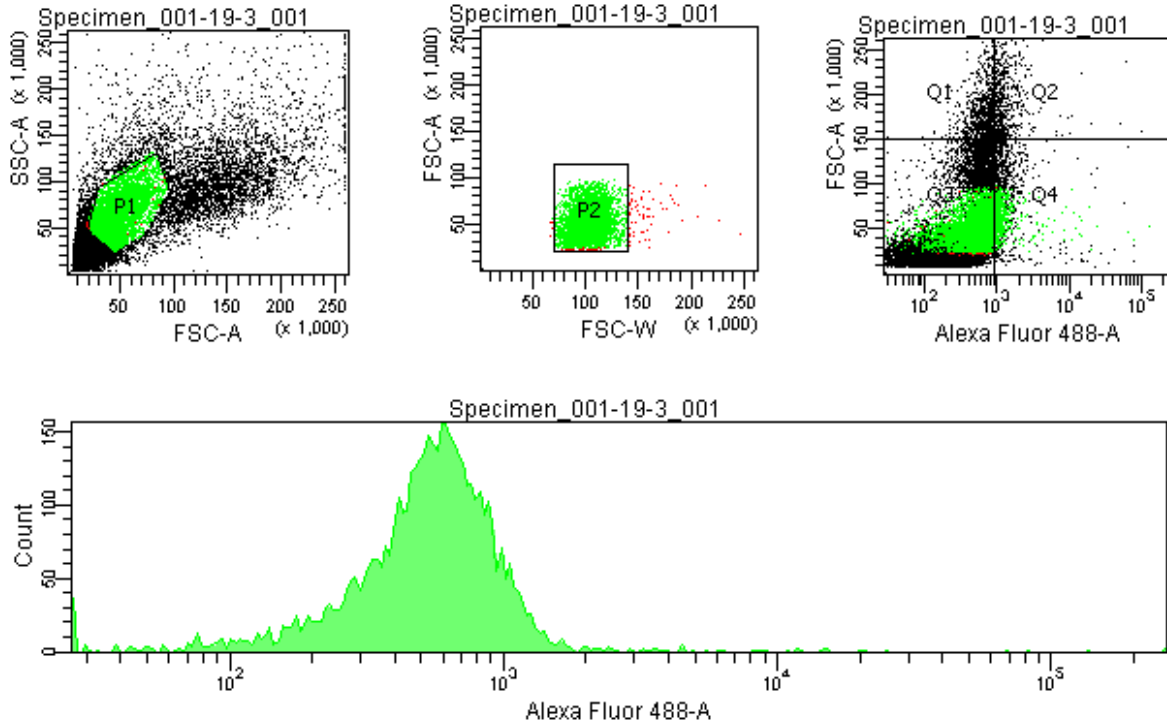

Experiment Name: Experiment\_20221019-EXPRESSION  
 Specimen Name: Specimen\_001  
 Tube Name: 19-3\_001  
 Record Date: Oct 19, 2022 4:24:21 PM  
 \$OP: Administrator

| Population   | #Events | %Parent | FSC-A Mean |
|--------------|---------|---------|------------|
| ■ All Events | 20,000  | ###     | 47,075     |
| ☒ Q1         | 697     | 3.5     | 179,781    |
| ☒ Q2         | 684     | 3.4     | 202,881    |
| ☒ Q3         | 17,156  | 85.8    | 32,817     |
| ☒ Q4         | 1,463   | 7.3     | 78,207     |
| ■ P1         | 4,746   | 23.7    | 48,389     |
| ■ P2         | 4,631   | 97.6    | 48,425     |

Tube: 19-3\_001

| Population   | #Events | %Parent | %Total |
|--------------|---------|---------|--------|
| ■ All Events | 20,000  | ###     | 100.0  |
| ☒ Q1         | 697     | 3.5     | 3.5    |
| ☒ Q2         | 684     | 3.4     | 3.4    |
| ☒ Q3         | 17,156  | 85.8    | 85.8   |
| ☒ Q4         | 1,463   | 7.3     | 7.3    |
| ■ P1         | 4,746   | 23.7    | 23.7   |
| ■ P2         | 4,631   | 97.6    | 23.2   |

# FACSDiva Version 6.2

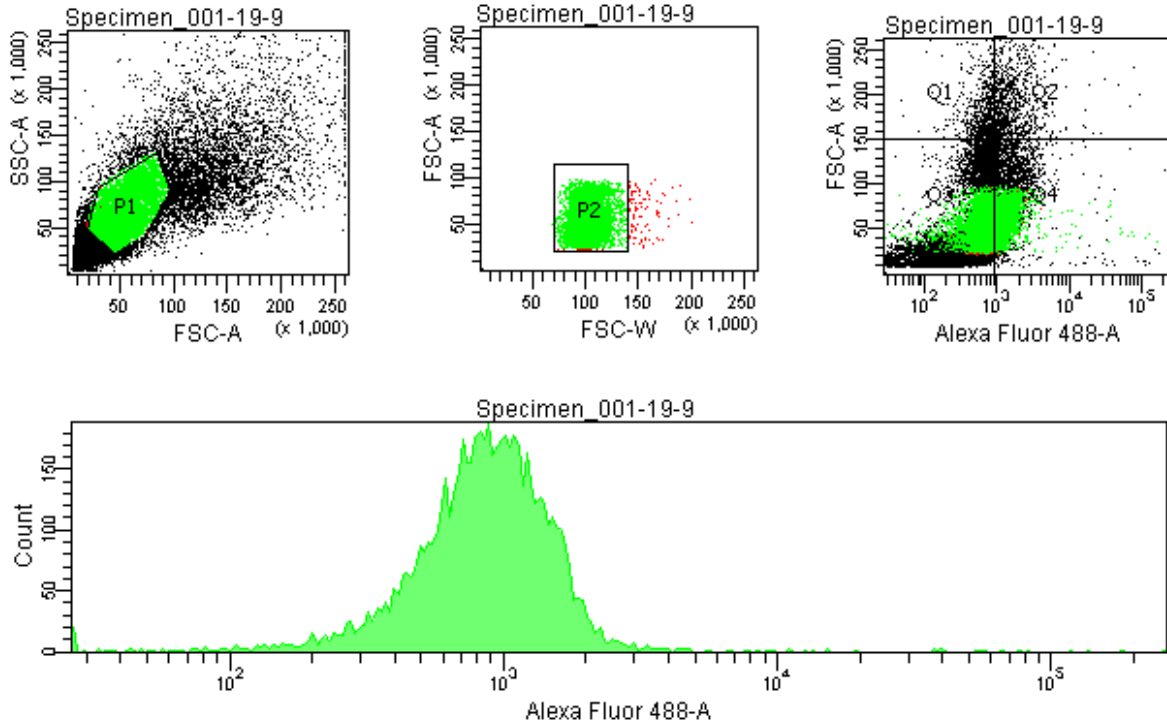

Experiment Name: Experiment\_20221019-EXPRESSION  
 Specimen Name: Specimen\_001  
 Tube Name: 19-9  
 Record Date: Oct 19, 2022 4:26:20 PM  
 \$OP: Administrator

| Population | #Events | %Parent | FSC-A Mean |
|------------|---------|---------|------------|
| All Events | 20,000  | ###     | 56,984     |
| Q1         | 563     | 2.8     | 181,388    |
| Q2         | 1,031   | 5.2     | 202,210    |
| Q3         | 13,446  | 67.2    | 35,180     |
| Q4         | 4,960   | 24.8    | 71,785     |
| P1         | 6,235   | 31.2    | 52,323     |
| P2         | 6,107   | 97.9    | 52,325     |

Tube: 19-9

| Population | #Events | %Parent | %Total |
|------------|---------|---------|--------|
| All Events | 20,000  | ###     | 100.0  |
| Q1         | 563     | 2.8     | 2.8    |
| Q2         | 1,031   | 5.2     | 5.2    |
| Q3         | 13,446  | 67.2    | 67.2   |
| Q4         | 4,960   | 24.8    | 24.8   |
| P1         | 6,235   | 31.2    | 31.2   |
| P2         | 6,107   | 97.9    | 30.5   |

## FACSDiva Version 6.2

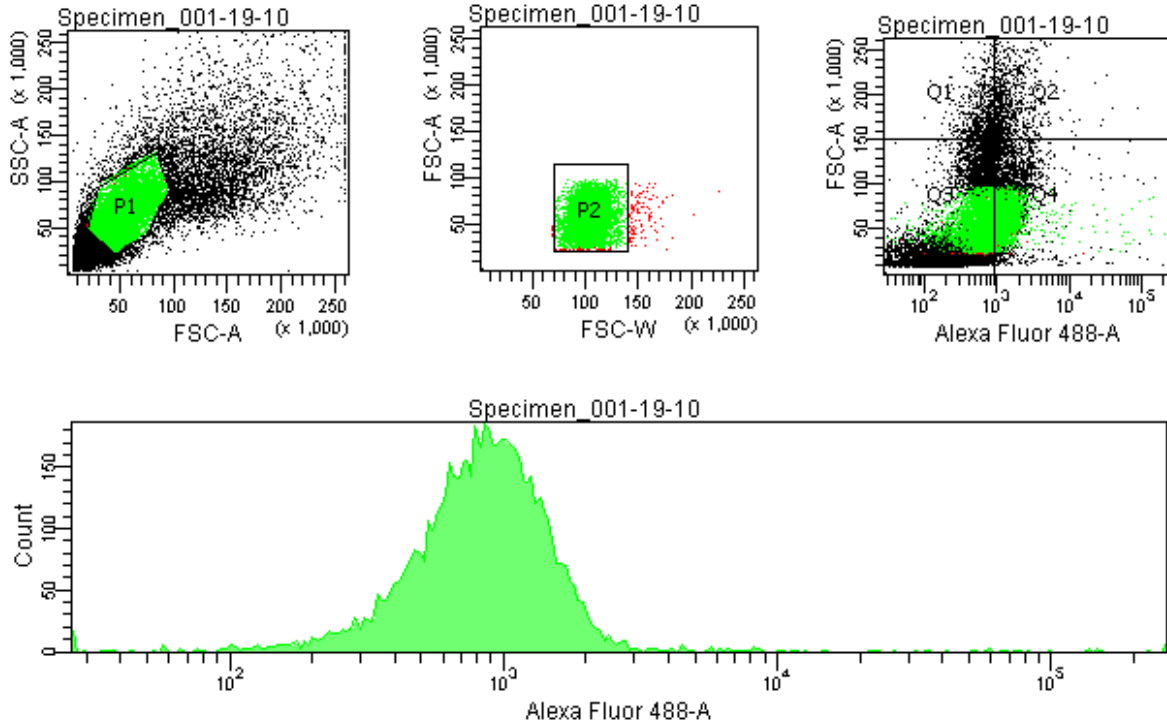

Experiment Name: Experiment\_20221019-EXPRESSION  
 Specimen Name: Specimen\_001  
 Tube Name: 19-10  
 Record Date: Oct 19, 2022 4:27:47 PM  
 \$OP: Administrator

| Population   | #Events | %Parent | FSC-A Mean |
|--------------|---------|---------|------------|
| ■ All Events | 20,000  | ####    | 55,745     |
| ☒ Q1         | 649     | 3.2     | 180,045    |
| ☒ Q2         | 955     | 4.8     | 197,383    |
| ☒ Q3         | 13,760  | 68.8    | 35,363     |
| ☒ Q4         | 4,636   | 23.2    | 69,660     |
| ■ P1         | 6,252   | 31.3    | 52,077     |
| ■ P2         | 6,091   | 97.4    | 52,193     |

Tube: 19-10

| Population   | #Events | %Parent | %Total |
|--------------|---------|---------|--------|
| ■ All Events | 20,000  | ####    | 100.0  |
| ☒ Q1         | 649     | 3.2     | 3.2    |
| ☒ Q2         | 955     | 4.8     | 4.8    |
| ☒ Q3         | 13,760  | 68.8    | 68.8   |
| ☒ Q4         | 4,636   | 23.2    | 23.2   |
| ■ P1         | 6,252   | 31.3    | 31.3   |
| ■ P2         | 6,091   | 97.4    | 30.5   |

## FACSDiva Version 6.2

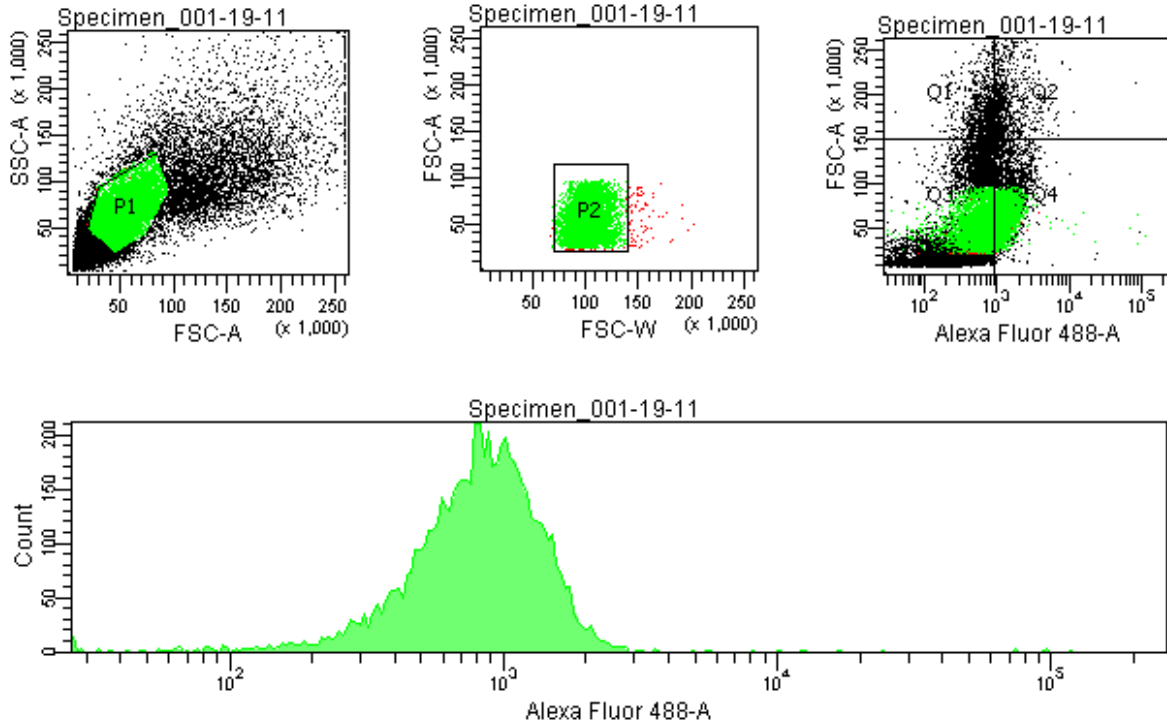

Experiment Name: Experiment\_20221019-EXPRESSION  
 Specimen Name: Specimen\_001  
 Tube Name: 19-11  
 Record Date: Oct 19, 2022 4:29:31 PM  
 \$OP: Administrator

| Population | #Events | %Parent | FSC-A Mean |
|------------|---------|---------|------------|
| All Events | 20,000  | ###     | 59,650     |
| Q1         | 821     | 4.1     | 182,279    |
| Q2         | 1,074   | 5.4     | 201,408    |
| Q3         | 13,801  | 69.0    | 37,786     |
| Q4         | 4,304   | 21.5    | 70,993     |
| P1         | 6,358   | 31.8    | 52,177     |
| P2         | 6,247   | 98.3    | 52,289     |

Tube: 19-11

| Population | #Events | %Parent | %Total |
|------------|---------|---------|--------|
| All Events | 20,000  | ###     | 100.0  |
| Q1         | 821     | 4.1     | 4.1    |
| Q2         | 1,074   | 5.4     | 5.4    |
| Q3         | 13,801  | 69.0    | 69.0   |
| Q4         | 4,304   | 21.5    | 21.5   |
| P1         | 6,358   | 31.8    | 31.8   |
| P2         | 6,247   | 98.3    | 31.2   |

# FACSDiva Version 6.2

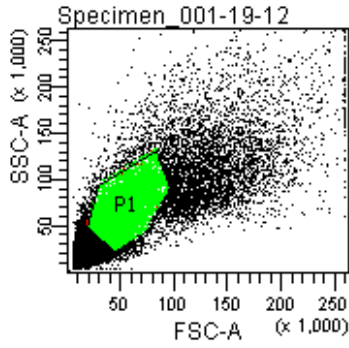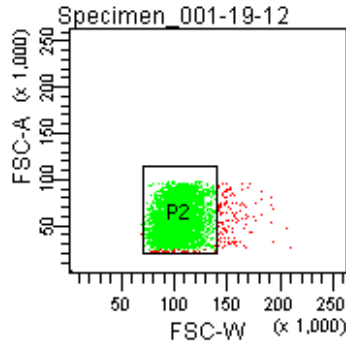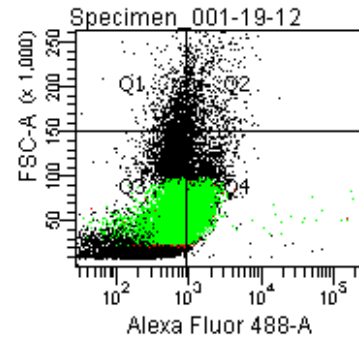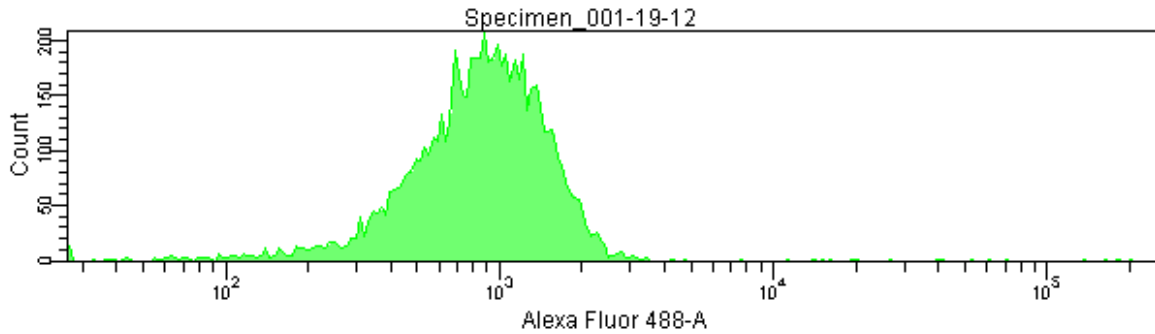

Experiment Name: Experiment\_20221019-EXPRESSION  
 Specimen Name: Specimen\_001  
 Tube Name: 19-12  
 Record Date: Oct 19, 2022 4:31:02 PM  
 \$OP: Administrator

| Population   | #Events | %Parent | FSC-A Mean |
|--------------|---------|---------|------------|
| ■ All Events | 20,000  | ###     | 59,593     |
| ☒ Q1         | 651     | 3.3     | 177,753    |
| ☒ Q2         | 934     | 4.7     | 199,257    |
| ☒ Q3         | 13,338  | 66.7    | 39,515     |
| ☒ Q4         | 5,077   | 25.4    | 71,496     |
| ■ P1         | 6,821   | 34.1    | 53,202     |
| ■ P2         | 6,648   | 97.5    | 53,254     |

Tube: 19-12

| Population   | #Events | %Parent | %Total |
|--------------|---------|---------|--------|
| ■ All Events | 20,000  | ###     | 100.0  |
| ☒ Q1         | 651     | 3.3     | 3.3    |
| ☒ Q2         | 934     | 4.7     | 4.7    |
| ☒ Q3         | 13,338  | 66.7    | 66.7   |
| ☒ Q4         | 5,077   | 25.4    | 25.4   |
| ■ P1         | 6,821   | 34.1    | 34.1   |
| ■ P2         | 6,648   | 97.5    | 33.2   |



## FACSDiva Version 6.2

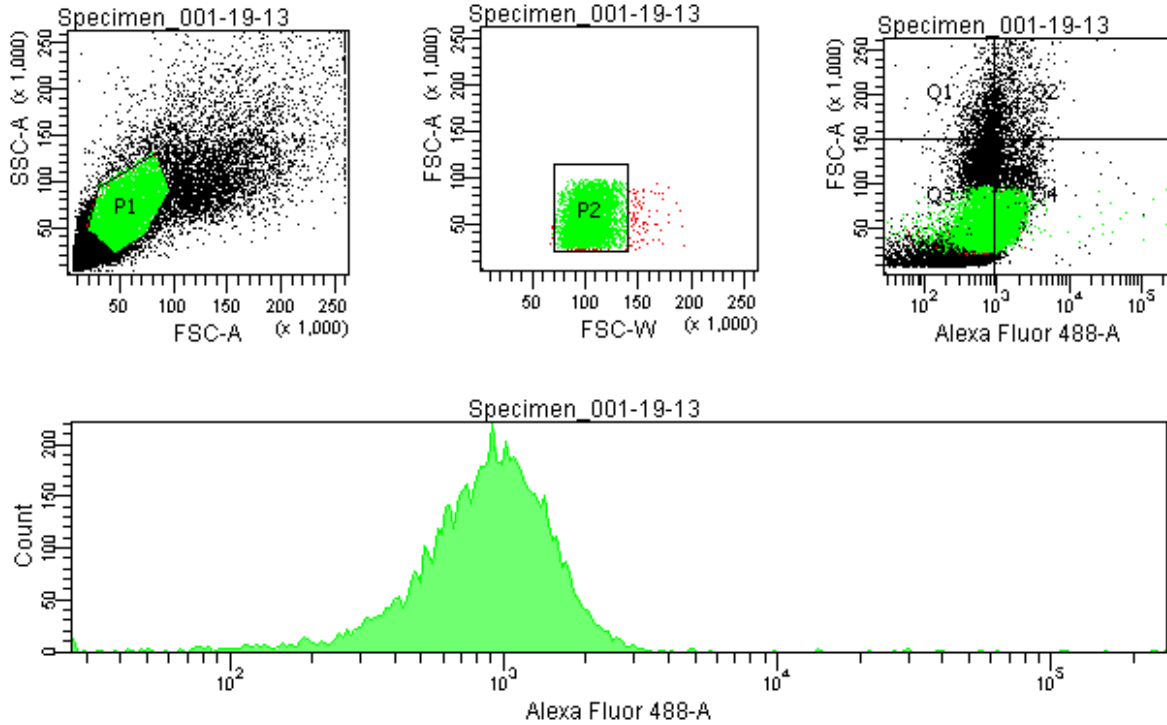

Experiment Name: Experiment\_20221019-EXPRESSION  
 Specimen Name: Specimen\_001  
 Tube Name: 19-13  
 Record Date: Oct 19, 2022 4:32:33 PM  
 \$OP: Administrator

| Population   | #Events | %Parent | FSC-A Mean |
|--------------|---------|---------|------------|
| ■ All Events | 20,000  | ###     | 61,429     |
| ☒ Q1         | 712     | 3.6     | 181,209    |
| ☒ Q2         | 1,146   | 5.7     | 199,894    |
| ☒ Q3         | 13,040  | 65.2    | 39,303     |
| ☒ Q4         | 5,102   | 25.5    | 70,163     |
| ■ P1         | 6,605   | 33.0    | 52,659     |
| ■ P2         | 6,473   | 98.0    | 52,785     |

Tube: 19-13

| Population   | #Events | %Parent | %Total |
|--------------|---------|---------|--------|
| ■ All Events | 20,000  | ###     | 100.0  |
| ☒ Q1         | 712     | 3.6     | 3.6    |
| ☒ Q2         | 1,146   | 5.7     | 5.7    |
| ☒ Q3         | 13,040  | 65.2    | 65.2   |
| ☒ Q4         | 5,102   | 25.5    | 25.5   |
| ■ P1         | 6,605   | 33.0    | 33.0   |
| ■ P2         | 6,473   | 98.0    | 32.4   |

## FACSDiva Version 6.2

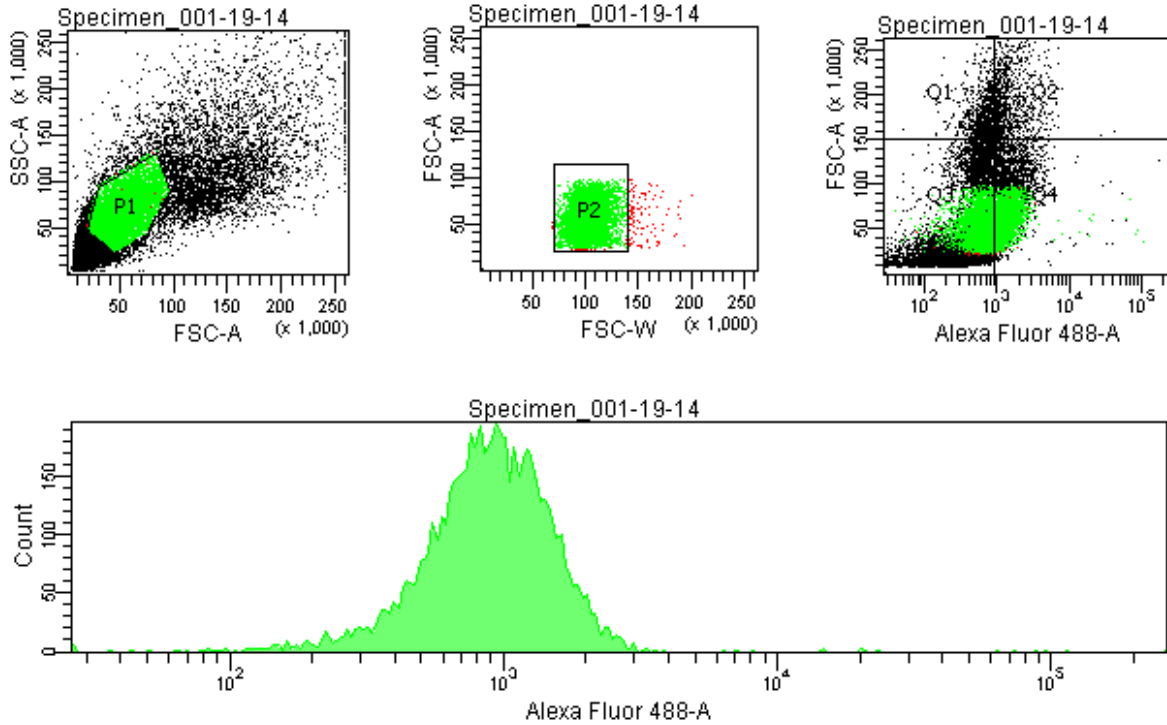

Experiment Name: Experiment\_20221019-EXPRESSION  
 Specimen Name: Specimen\_001  
 Tube Name: 19-14  
 Record Date: Oct 19, 2022 4:33:56 PM  
 \$OP: Administrator

| Population   | #Events | %Parent | FSC-A Mean |
|--------------|---------|---------|------------|
| ■ All Events | 20,000  | ####    | 58,681     |
| ☒ Q1         | 721     | 3.6     | 178,743    |
| ☒ Q2         | 1,146   | 5.7     | 202,363    |
| ☒ Q3         | 13,245  | 66.2    | 35,545     |
| ☒ Q4         | 4,888   | 24.4    | 69,974     |
| ■ P1         | 6,319   | 31.6    | 52,322     |
| ■ P2         | 6,160   | 97.5    | 52,417     |

Tube: 19-14

| Population   | #Events | %Parent | %Total |
|--------------|---------|---------|--------|
| ■ All Events | 20,000  | ####    | 100.0  |
| ☒ Q1         | 721     | 3.6     | 3.6    |
| ☒ Q2         | 1,146   | 5.7     | 5.7    |
| ☒ Q3         | 13,245  | 66.2    | 66.2   |
| ☒ Q4         | 4,888   | 24.4    | 24.4   |
| ■ P1         | 6,319   | 31.6    | 31.6   |
| ■ P2         | 6,160   | 97.5    | 30.8   |
